# Supplementary material for: Unusual high fluorescence of two nitro-distyrylbenzene-like compounds induced by CT processes affecting the fluorescence/intersystem-crossing competition
Source: Royal Society of Chemistry journal article supplement (doi:10.1039/c5cp00291e), 2015-01-01
Supplement: c5cp00291e1.pdf [file c5cp00291e1.pdf]

## Supporting Information

### Unusual high fluorescence of two nitro- distyrylbenzene -like compounds induced by CT processes affecting the fluorescence/intersystem-crossing competition<sup>†</sup>

B. Carlotti, F. Elisei, U. Mazzucato and A. Spalletti\*

*Department of Chemistry, Biology and Biotechnology and Centro di Eccellenza sui Materiali Innovativi Nanostrutturati (CEMIN), University of Perugia, 06123 Perugia, Italy*

#### Temperature effect on the spectral behaviour

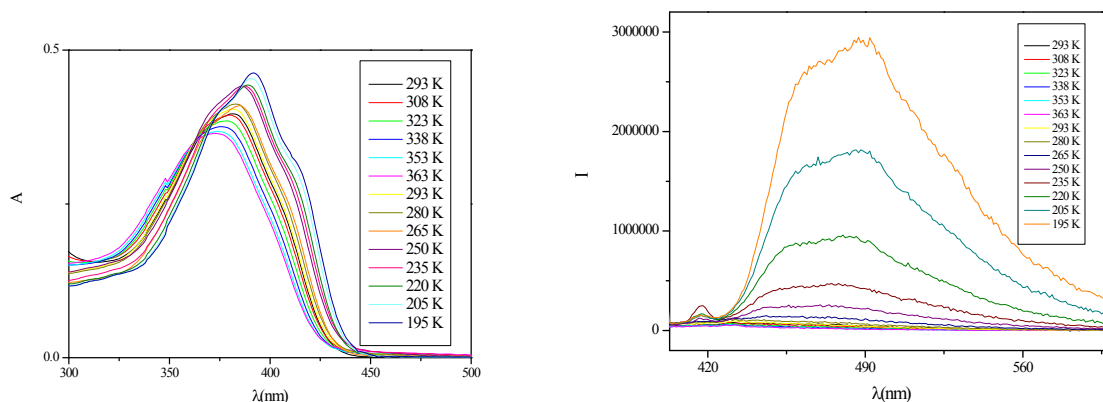

**Figure S1.** Absorption (left) and emission (right) spectra of **1** in Tol as a function of temperature.

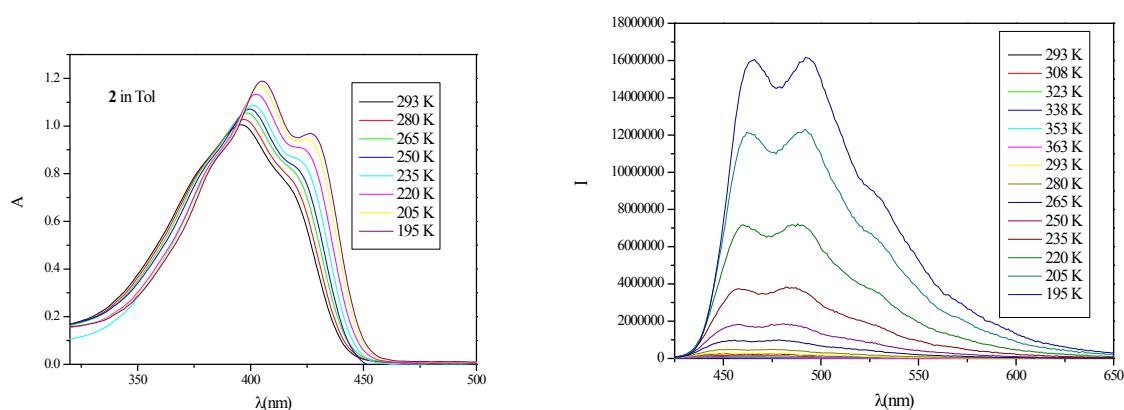

**Figure S2.** Absorption (left) and emission (right) spectra of **2** in Tol as a function of temperature.

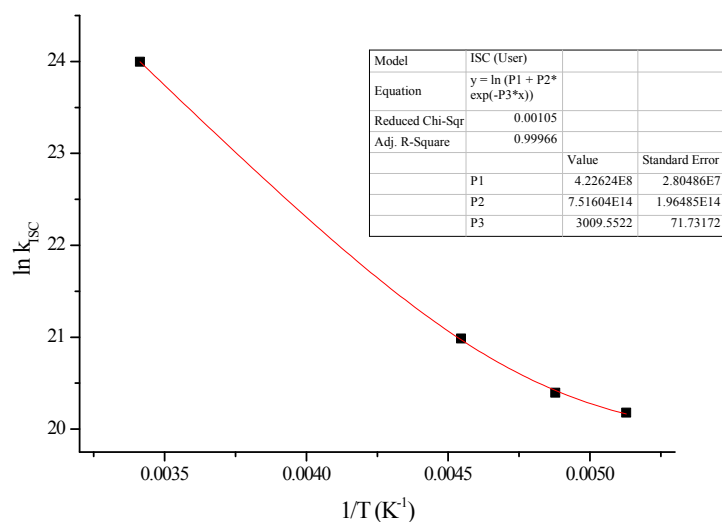

**Figure S3.** Best fit of  $k_{ISC}$  data of **2** in toluene at different temperatures according to equation S1.

$$y = \ln (P1 + P2 * \exp(-P3 * x)) \text{ where } y = \ln k_{ISC}, x = 1/T, P1 = k_{ISC}^0, P2 = A_{ISC}, P3 = E_a/R \quad \text{eq. S1}$$

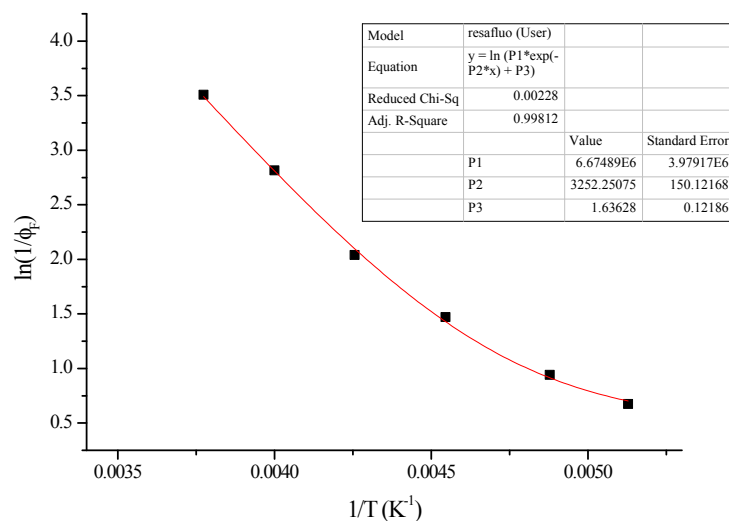

**Figure S4.** Best fit of  $\phi_F$  data of **2** in toluene at different temperatures according to equation S2.

$$y = \ln (P1 * \exp(-P2 * x) + P3) \text{ where } y = \ln(1/\phi_F), x = 1/T, P1 = A \tau_F^{\lim} / \phi_F^{\lim}, P2 = E_{act}/R, P3 = 1/\phi_F^{\lim} \quad \text{eq. S2}$$

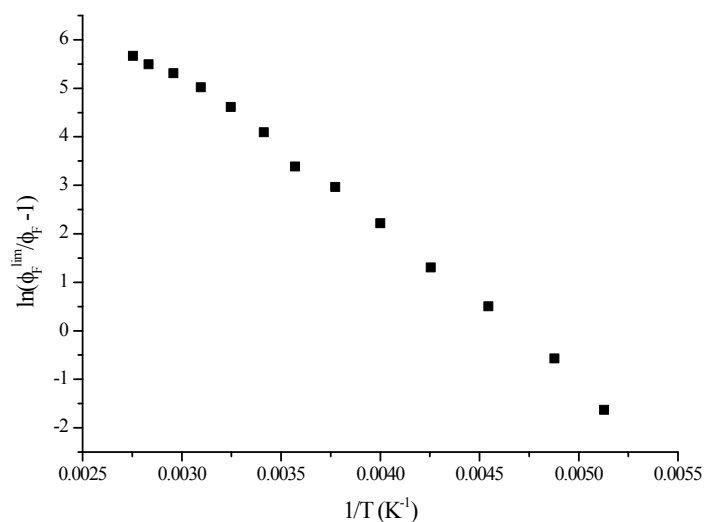

**Figure S5.** Trend of  $\phi_F$  data of **2** in toluene as a function of temperature in all the range investigated, according to equation S3.

$$\ln\left(\frac{\phi_F^{\text{lim}}}{\phi_F} - 1\right) = \ln A \tau_F^{\text{lim}} - E_{\text{act}}/R \quad \text{eq. S3}$$

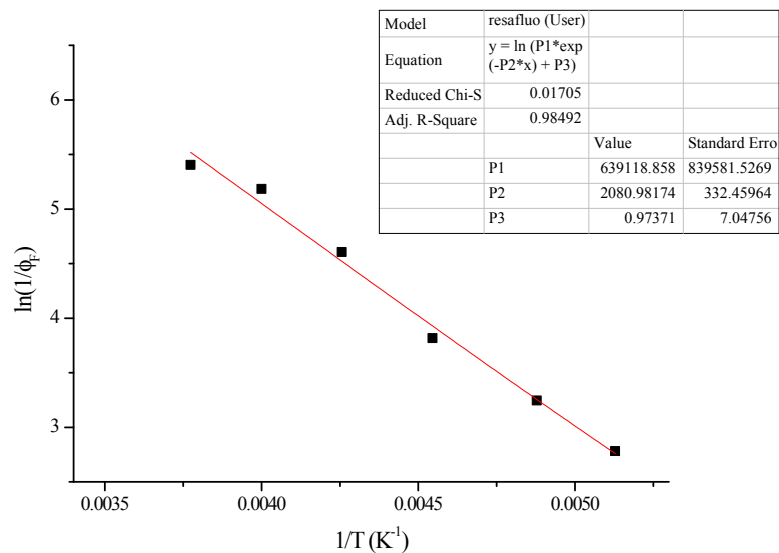

**Figure S6.** Best fit of  $\phi_F$  data of **1** in toluene at different temperatures according to equation S2.

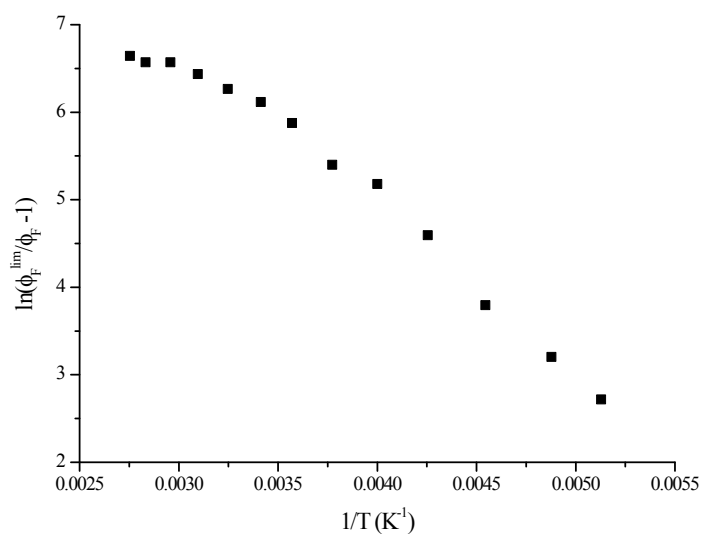

**Figure S7.** Trend of  $\phi_F$  data of **1** in toluene as a function of temperature in all the range investigated, according to equation S3.

**Table S1.** Summary of the derived parameters for the activated decay channels for **1** and **2**. The energy barrier ( $E_a$ ) from experimental data in Tol and the energy difference between  $S_1$  and  $T_n$  [ $\Delta E_{th}(S_1-T_n)$ ] from DTFT calculations in Tol and MeCN, are in kcal/mol and  $k_{ISC}^0$  in  $s^{-1}$ .

| compound | by Eq. 2S      |       | by Eq. 1S   |       | $\Delta E_{th}(S_1-T_n)$<br>in Tol | $\Delta E_{th}(S_1-T_n)$<br>in MeCN |
|----------|----------------|-------|-------------|-------|------------------------------------|-------------------------------------|
|          | $\Phi_F^{lim}$ | $E_a$ | $k_{ISC}^0$ | $E_a$ |                                    |                                     |
| <b>1</b> | 1.0            | 4.1   |             |       | 0.7                                | 1.6                                 |
| <b>2</b> | 0.61           | 6.5   | 4.2E8       | 6.0   | 3.4                                | 4.7                                 |

## Quantum-mechanical calculations

### Compound 1:

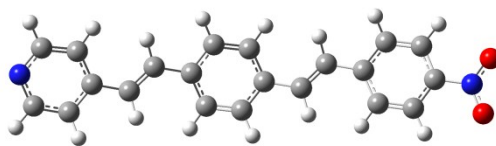

**Table S2.** Transition energy, nature and oscillator strength (f) of the lowest excited singlet and triplet states of **1** in MeCN (simulated by the CPCM model) obtained by TDDFT/CAM-B3LYP calculation after CAM-B3LYP optimization of the ground state; the 6-31G(d) basis set was used in all cases. Experimental transition energies are also reported for comparison.

| Comp.d   | Excited state | Transition energy (eV) |      | Multiplicity | Nature                              | (%) | f      |
|----------|---------------|------------------------|------|--------------|-------------------------------------|-----|--------|
|          |               | Calc.                  | Exp. |              |                                     |     |        |
| <b>1</b> | 1             | 1.84                   |      | Triplet      | $\pi_{H-1} \rightarrow \pi_L^*$     | 55  | 0.0000 |
|          | 2             | 2.52                   |      | Triplet      | $\pi_{H-1} \rightarrow \pi_L^*$     | 33  | 0.0000 |
|          | 3             | 2.79                   |      | Triplet      | $\pi_{H-8} \rightarrow \pi_L^*$     | 61  | 0.0000 |
|          | 4             | 3.37                   | 3.28 | Singlet      | $\pi_{H-1} \rightarrow \pi_L^*$     | 81  | 2.0679 |
|          | 5             | 3.38                   |      | Triplet      | $\pi_{H-6} \rightarrow \pi_L^*$     | 21  | 0.0000 |
|          | 6             | 3.44                   |      | Triplet      | $n_{H-7} \rightarrow \pi_L^*$       | 62  | 0.0000 |
|          | 7             | 3.94                   |      | Triplet      | $n_{H-5} \rightarrow \pi_L^*$       | 68  | 0.0000 |
|          | 8             | 3.97                   |      | Triplet      | $\pi_{H-3} \rightarrow \pi_{L+4}^*$ | 22  | 0.0000 |
|          | 9             | 4.01                   |      | Singlet      | $n_{H-7} \rightarrow \pi_L^*$       | 65  | 0.0000 |
|          | 10            | 4.04                   |      | Triplet      | $n_{H-10} \rightarrow \pi_L^*$      | 63  | 0.0000 |
|          | 11            | 4.12                   |      | Triplet      | $\pi_{H-2} \rightarrow \pi_L^*$     | 34  | 0.0000 |
|          | 12            | 4.23                   |      | Singlet      | $\pi_{H-1} \rightarrow \pi_{L+1}^*$ | 69  | 0.0956 |

**Table S3.** Transition energy, nature and oscillator strength (f) of the lowest excited singlet and triplet states of **1** in Tol (simulated by the CPCM model) obtained by TDDFT/CAM-B3LYP calculation after CAM-B3LYP optimization of the ground state; the 6-31G(d) basis set was used in all cases. Experimental transition energies are also reported for comparison.

| Comp.d   | Excited state | Transition energy (eV) |      | Multiplicity | Nature                              | (%) | f      |
|----------|---------------|------------------------|------|--------------|-------------------------------------|-----|--------|
|          |               | Calc.                  | Exp. |              |                                     |     |        |
| <b>1</b> | 1             | 1.85                   |      | Triplet      | $\pi_{H-1} \rightarrow \pi_{L+1}^*$ | 59  | 0.0000 |
|          | 2             | 2.54                   |      | Triplet      | $\pi_{H-1} \rightarrow \pi_{L+2}^*$ | 36  | 0.0000 |
|          | 3             | 2.73                   |      | Triplet      | $\pi_{H-8} \rightarrow \pi_{L+1}^*$ | 53  | 0.0000 |
|          | 4             | 3.40                   | 3.25 | Singlet      | $\pi_{H-1} \rightarrow \pi_{L+1}^*$ | 83  | 2.1345 |
|          | 5             | 3.40                   |      | Triplet      | $\pi_{H-6} \rightarrow \pi_{L+1}^*$ | 22  | 0.0000 |
|          | 6             | 3.43                   |      | Triplet      | $n_{H-7} \rightarrow \pi_{L+1}^*$   | 55  | 0.0000 |
|          | 7             | 3.96                   |      | Triplet      | $\pi_{H-2} \rightarrow \pi_{L+5}^*$ | 25  | 0.0000 |
|          | 8             | 4.00                   |      | Singlet      | $n_{H-7} \rightarrow \pi_{L+1}^*$   | 58  | 0.0000 |
|          | 9             | 4.02                   |      | Triplet      | $\pi_{H-5} \rightarrow \pi_{L+1}^*$ | 73  | 0.0000 |
|          | 10            | 4.14                   |      | Triplet      | $\pi_{H-3} \rightarrow \pi_{L+1}^*$ | 33  | 0.0000 |
|          | 11            | 4.20                   |      | Triplet      | $n_{H-4} \rightarrow \pi_{L+1}^*$   | 14  | 0.0000 |
|          | 12            | 4.29                   |      | Singlet      | $\pi_{H-1} \rightarrow \pi_{L+1}^*$ | 66  | 0.0579 |

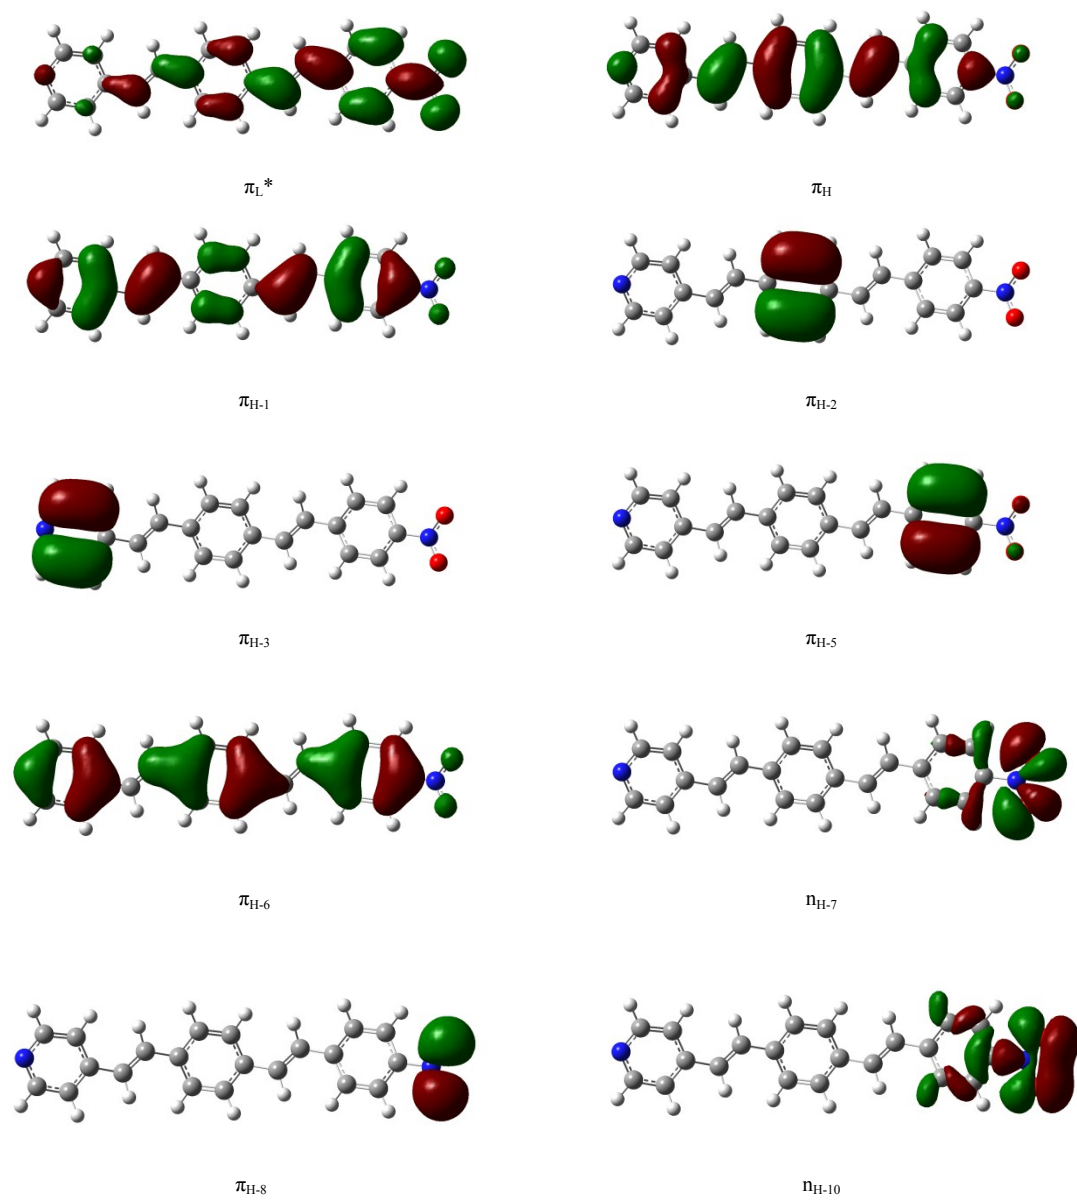

**Figure S8.** Molecular orbitals involved in the main configurations describing the lowest singlet and triplet states of **1**.

## Compound 2:

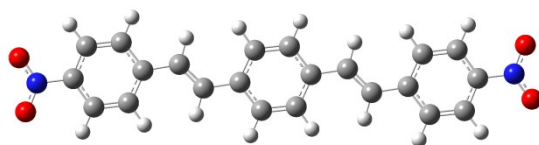

**Table S4.** Transition energy, nature and oscillator strength (f) of the lowest excited singlet and triplet states of **2** in MeCN (simulated by the CPCM model) obtained by TDDFT/CAM-B3LYP calculation after CAM-B3LYP optimization of the ground state; the 6-31G(d) basis set was used in all cases. Experimental transition energies are also reported for comparison.

| Comp.d   | Excited state | Transition energy (eV) |      | Multiplicity | Nature                               | (%) | f      |
|----------|---------------|------------------------|------|--------------|--------------------------------------|-----|--------|
|          |               | Calc.                  | Exp. |              |                                      |     |        |
| <b>2</b> | 1             | 1.78                   |      | Triplet      | $\pi_H \rightarrow \pi_L^*$          | 62  | 0.0000 |
|          | 2             | 2.38                   |      | Triplet      | $\pi_{H-1} \rightarrow \pi_L^*$      | 40  | 0.0000 |
|          | 3             | 2.79                   |      | Triplet      | $\pi_{H-10} \rightarrow \pi_{L+1}^*$ | 42  | 0.0000 |
|          | 4             | 2.79                   |      | Triplet      | $\pi_{H-9} \rightarrow \pi_{L+1}^*$  | 42  | 0.0000 |
|          | 5             | 3.20                   |      | Triplet      | $\pi_{H-5} \rightarrow \pi_L^*$      | 25  | 0.0000 |
|          | 6             | 3.24                   | 3.13 | Singlet      | $\pi_H \rightarrow \pi_L^*$          | 85  | 2.3797 |
|          | 7             | 3.44                   |      | Triplet      | $n_{H-7} \rightarrow \pi_{L+1}^*$    | 42  | 0.0000 |
|          | 8             | 3.44                   |      | Triplet      | $n_{H-6} \rightarrow \pi_{L+1}^*$    | 42  | 0.0000 |
|          | 9             | 3.79                   |      | Triplet      | $\pi_{H-1} \rightarrow \pi_{L+2}^*$  | 21  | 0.0000 |
|          | 10            | 3.90                   |      | Singlet      | $\pi_H \rightarrow \pi_{L+1}^*$      | 73  | 0.0000 |
|          | 11            | 3.94                   |      | Triplet      | $\pi_{H-4} \rightarrow \pi_L^*$      | 48  | 0.0000 |
|          | 12            | 4.01                   |      | Singlet      | $n_{H-7} \rightarrow \pi_{L+1}^*$    | 43  | 0.0000 |



**Table S5.** Transition energy, nature and oscillator strength (f) of the lowest excited singlet and triplet states of **2** in Tol obtained by TDDFT/CAM-B3LYP calculation after CAM-B3LYP optimization of the ground state; the 6-31G(d) basis set was used in all cases. Experimental transition energies are also reported for comparison.

| Comp.d   | Excited state | Transition energy (eV) |      | Multiplicity | Nature                              | (%) | f      |
|----------|---------------|------------------------|------|--------------|-------------------------------------|-----|--------|
|          |               | Calc.                  | Exp. |              |                                     |     |        |
| <b>2</b> | 1             | 1.80                   |      | Triplet      | $\pi_H \rightarrow \pi_L^*$         | 65  | 0.0000 |
|          | 2             | 2.42                   |      | Triplet      | $\pi_{H-1} \rightarrow \pi_L^*$     | 41  | 0.0000 |
|          | 3             | 2.73                   |      | Triplet      | $\pi_{H-9} \rightarrow \pi_{L+1}^*$ | 35  | 0.0000 |
|          | 4             | 2.73                   |      | Triplet      | $\pi_{H-8} \rightarrow \pi_{L+1}^*$ | 35  | 0.0000 |
|          | 5             | 3.24                   |      | Triplet      | $\pi_{H-5} \rightarrow \pi_L^*$     | 25  | 0.0000 |
|          | 6             | 3.28                   | 3.13 | Singlet      | $\pi_H \rightarrow \pi_L^*$         | 85  | 2.4161 |
|          | 7             | 3.43                   |      | Triplet      | $n_{H-7} \rightarrow \pi_{L+1}^*$   | 34  | 0.0000 |
|          | 8             | 3.43                   |      | Triplet      | $n_{H-6} \rightarrow \pi_{L+1}^*$   | 34  | 0.0000 |
|          | 9             | 3.83                   |      | Triplet      | $\pi_{H-12} \rightarrow \pi_L^*$    | 20  | 0.0000 |
|          | 10            | 3.99                   |      | Singlet      | $\pi_H \rightarrow \pi_{L+1}^*$     | 69  | 0.0000 |
|          | 11            | 4.01                   |      | Singlet      | $n_{H-7} \rightarrow \pi_{L+1}^*$   | 39  | 0.0000 |
|          | 12            | 4.01                   |      | Singlet      | $n_{H-6} \rightarrow \pi_{L+1}^*$   | 39  | 0.0000 |

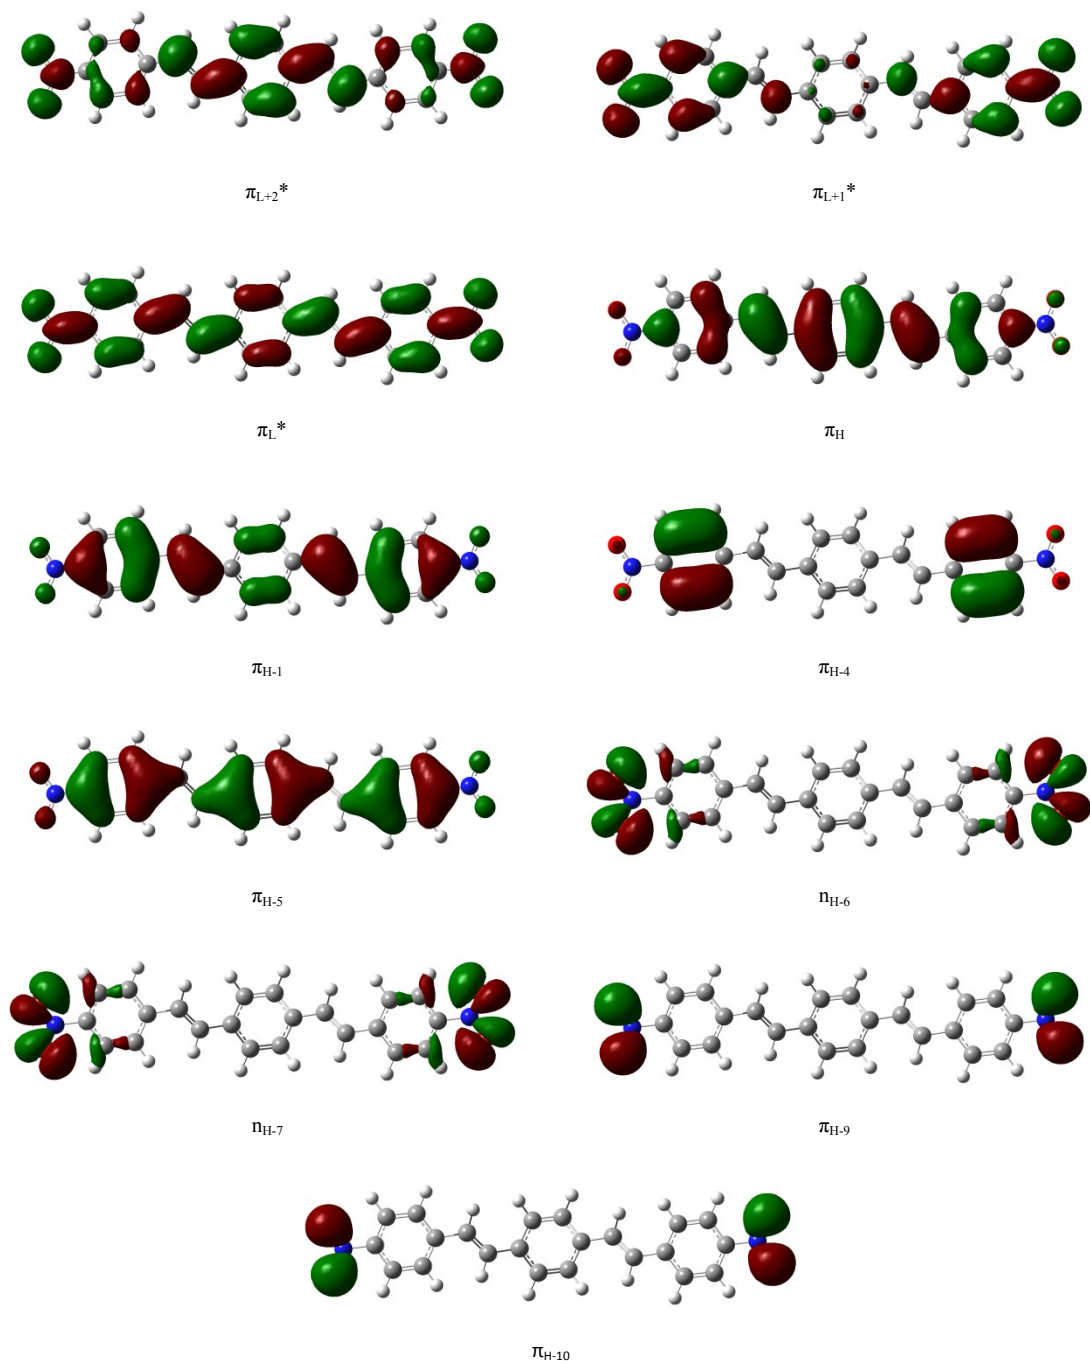

**Figure S9.** Molecular orbitals involved in the main configurations describing the lowest singlet and triplet states of **2**.

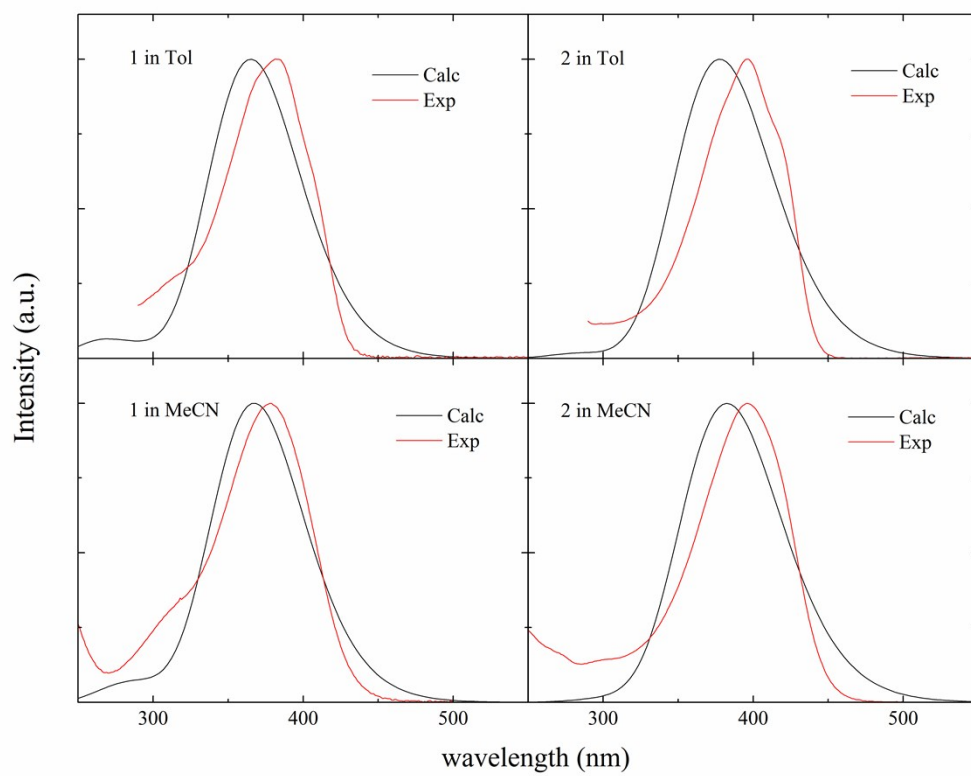

**Figure S10.** Normalized absorption spectra of **1** and **2** recorded in toluene and acetonitrile (red lines) compared with those calculated by CAM-B3LYP/6-31G(d) including the CPCM model (black lines).
